# Supplementary material
Source: PubMed Central journal article supplement (PMC5506784)

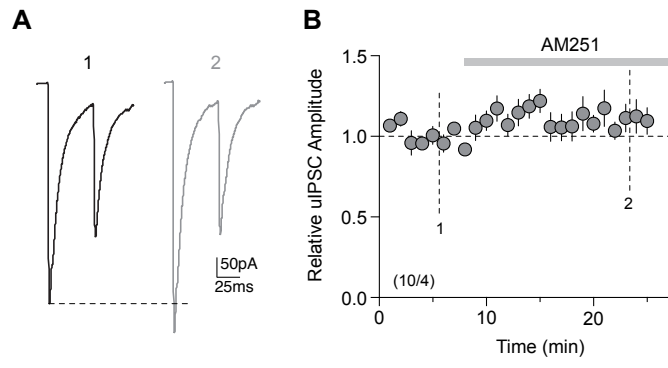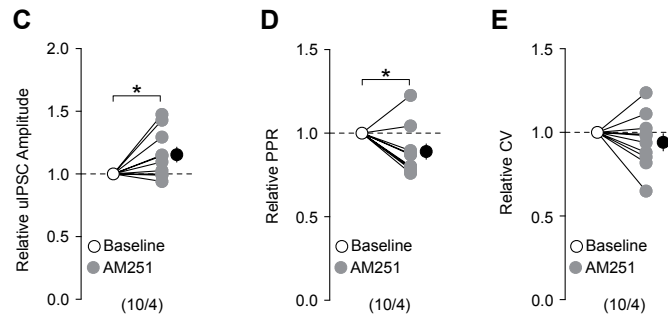

Supplement: npp2016275x2.pdf [file npp2016275x2.pdf]

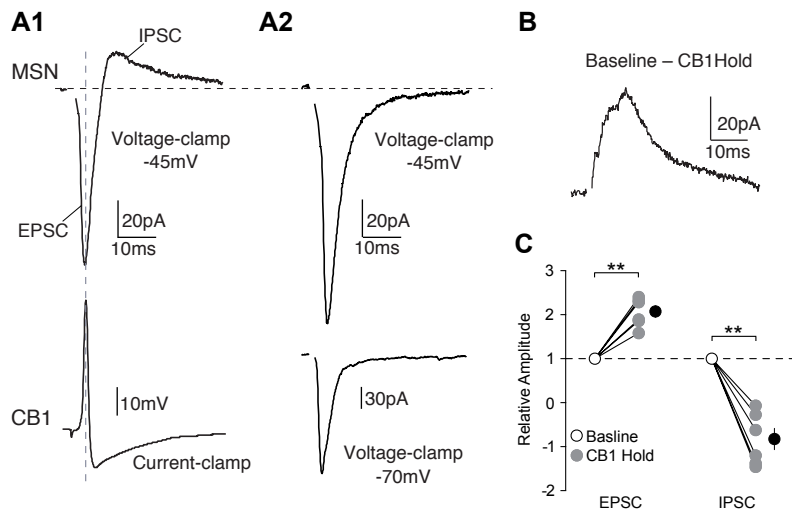

Supplement: npp2016275x3.pdf [file npp2016275x3.pdf]

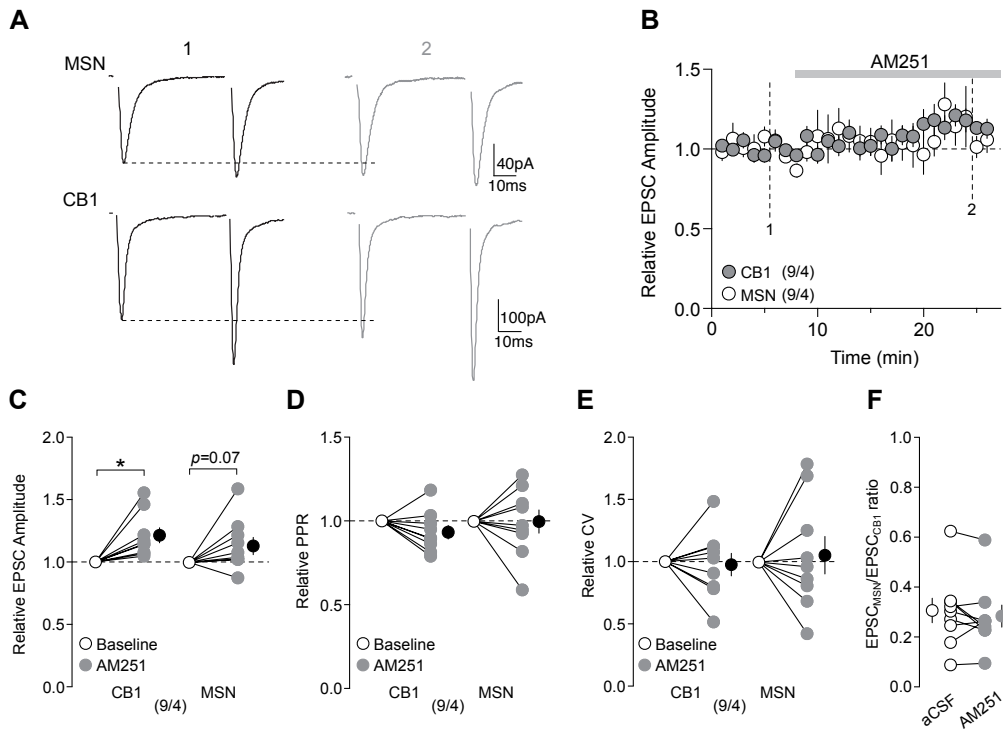

Supplement: npp2016275x4.pdf [file npp2016275x4.pdf]

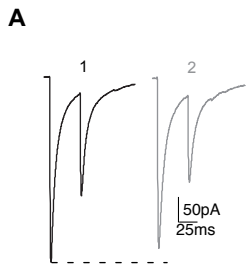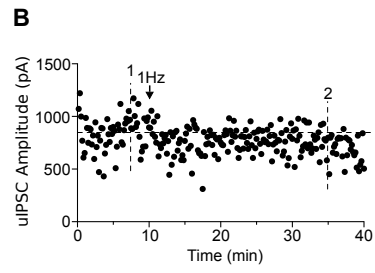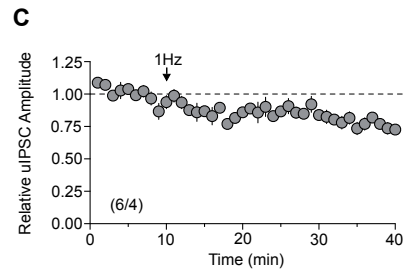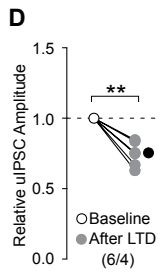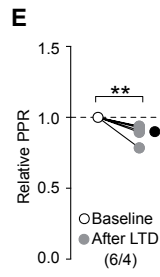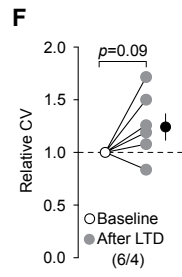

Supplement: npp2016275x5.pdf [file npp2016275x5.pdf]
